# Supplementary material for: Synthesis and properties of an O-doped aromatic belt
Source: Royal Society of Chemistry journal article supplement (doi:10.1039/d4cc01667j), 2024-01-01
Supplement: d4cc01667j1.pdf [file d4cc01667j1.pdf]

## Electronic Supplementary Information

### Synthesis and property of an *O*-doped aromatic belt

Ying Han,<sup>a,\*</sup> Wei-Chen Guo,<sup>a,b</sup> Xu-Sheng Du<sup>a</sup> and Chuan-Feng Chen<sup>a,b,\*</sup>

<sup>a</sup> *Beijing National Laboratory for Molecular Sciences, CAS Key Laboratory of Molecular Recognition and Function, Institute of Chemistry, Chinese Academy of Sciences, Beijing 100190, China.*

<sup>b</sup> *University of Chinese Academy of Sciences, Beijing 100049, China.*

*Email: hanying463@iccas.ac.cn; cchen@iccas.ac.cn*

### Contents

|                                                                                     |            |
|-------------------------------------------------------------------------------------|------------|
| <b>1. General information .....</b>                                                 | <b>S2</b>  |
| <b>2. Synthesis and optimization of the reaction conditions .....</b>               | <b>S2</b>  |
| <b>3. <sup>1</sup>H, <sup>13</sup>C NMR and HRMS spectra for new compounds.....</b> | <b>S7</b>  |
| <b>4. X-Ray crystallographic analysis .....</b>                                     | <b>S15</b> |
| <b>5. Theoretical calculations.....</b>                                             | <b>S20</b> |
| <b>6. Reference.....</b>                                                            | <b>S25</b> |

## 1. General information

The commercially available reagents were used without further purification. Solvents were employed as purchased or dried with Molecular Sieves.  $^1\text{H}$  NMR spectra and  $^{13}\text{C}$  NMR spectra were recorded on the Bruker NMR spectrometer. Atmospheric pressure chemical ionization mass spectra (APCI-MS) were recorded on the Thermo Fisher® Exactive high-resolution LC-MS spectrometer. Circular dichroism spectroscopy was recorded on a J-815 spectrometer. UV-vis absorption spectroscopy was recorded on a UV/VIS/NIR spectrometer. Fluorescence emission spectroscopy was recorded on a Lambda 950 spectrometer. Preparative silica gel plates separation and normal TLC analysis were performed on pre-coated, glass-backed silica gel plates. The energy-minimized structures of aromatic belts were optimized using the Gaussian 09 program,<sup>S1</sup> based on the density functional theory (DFT) using the B3LYP functional and 6-31G(d) basis set.

## 2. Synthesis and optimization of the reaction conditions

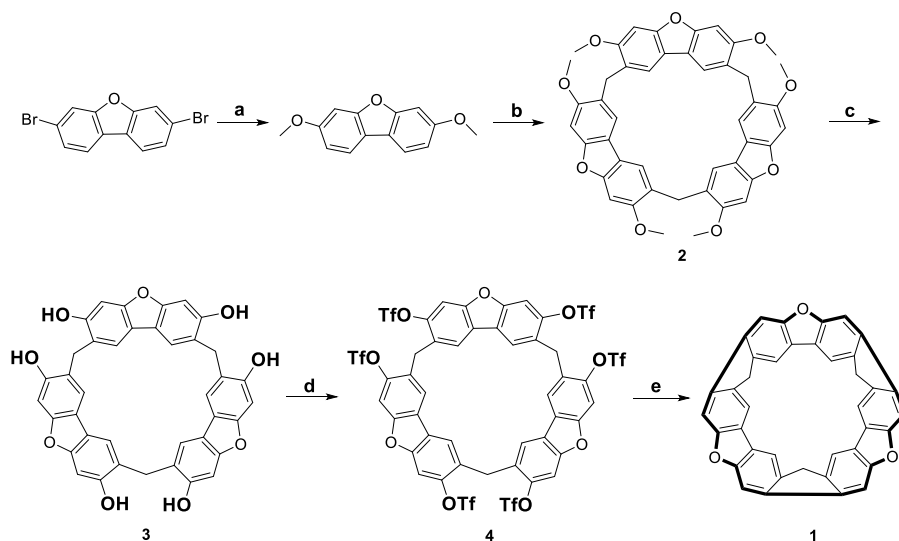

**Scheme S1.** Synthesis route of *O*-doped aromatic belt **1**. Reagents and conditions: (a) NaOMe, MeOAc, CuBr, Toluene, 110 °C, 72 h, 98%; (b)  $\text{FeCl}_3 \cdot 6\text{H}_2\text{O}$ ,  $(\text{CH}_2\text{O})_n$ ,  $\text{CH}_2\text{Cl}_2$ , 0 °C, 2 h, 33%; (c)  $\text{BBr}_3$ ,  $\text{CH}_2\text{Cl}_2$ , 0 °C, 12 h, 86%; (d)  $\text{Tf}_2\text{O}$ , pyridine,  $\text{CH}_2\text{Cl}_2$ , 0 °C, 6 h, 61%; (e)  $\text{Ni}(\text{cod})_2$ , bpy, NMP, 95 °C, 6 h, 10%.

## 2.1 Synthesis of 3,7-dimethoxydibenzofuran

To a solution of 3,7-dibromodibenzofuran (3.25 g, 10 mmol) and copper(I) bromide (0.75 g, 0.5 mmol) in anhydrous toluene (300 mL) was added methyl acetate (100 mL) at room temperature under argon atmosphere. The mixture was stirred 5 minutes, and then added sodium methoxide (30% ww, methanol solution) (50 mL). The mixture was heated to 110 °C in an oil bath for 72 hours. Then the mixture was cooled down to room temperature, and quenched with water, and extracted with dichloromethane (200 mL×3). The combined organic layer was dried with anhydrous MgSO<sub>4</sub>, and concentrated under a reduced pressure to give a crude solid. The crude solid was purified by silica gel column chromatography (eluent: dichloromethane/petroleum ether=1/3, v/v) to obtain the target compound. Yield: 98% (2.24 g), white solid. M.p.: 161-163 °C. <sup>1</sup>H NMR (400 MHz, CDCl<sub>3</sub>, 298 K): δ 7.62 (d, *J*=12.0 Hz, 2H), 6.99 (s, 2H), 6.82 (dd, *J*=12.0, 2H), 3.82 (s, 6 H). <sup>13</sup>C NMR (100 MHz, CDCl<sub>3</sub>, 298 K): δ 157.9, 156.5, 119.0, 116.5, 109.6, 95.6, 54.7. HRMS (APCI): *m/z* calcd for [M+H]<sup>+</sup>: C<sub>14</sub>H<sub>13</sub>O<sub>3</sub><sup>+</sup>: 229.0859, found 229.0862.

## 2.2 Synthesis of dibenzofuran[3]arene (2)

To a solution of 3,7-dimethoxydibenzofuran (1.14 g, 5 mmol) and paraformaldehyde (465 mg, 15 mmol) in anhydrous dichloromethane (500 mL) was added FeCl<sub>3</sub>·6H<sub>2</sub>O (270 mg, 1 mmol) at 0 °C. The mixture was stirred for 2 h at 0 °C. Then the reaction was quenched by the addition of water (200 mL), and extracted with dichloromethane (3×200 mL). The combined organic layer was dried with anhydrous MgSO<sub>4</sub>, and concentrated under a reduced pressure to give a crude solid. The crude solid was purified by silica gel column chromatography (eluent: dichloromethane/petroleum ether=2/3, v/v) to obtain macrocycle **2**. Yield: 33% (1.11 g), white solid, M.p.: >280 °C. <sup>1</sup>H NMR (400 MHz, CDCl<sub>3</sub>, 298 K): δ 7.46 (s, 6H), 7.09 (s, 6H), 4.14 (s, 6H), 3.92 (s, 18 H). <sup>13</sup>C NMR (100 MHz, CDCl<sub>3</sub>, 298 K): δ 156.6, 155.3, 124.6, 120.6, 116.7, 93.4, 55.9, 27.2. HRMS (APCI): *m/z* calcd for [M+H]<sup>+</sup>: C<sub>45</sub>H<sub>37</sub>O<sub>9</sub><sup>+</sup>: 721.2432, found 721.2440.

### 2.3 Synthesis of dihydroxydibenzofuran[3]arene (3)

To a solution of **2** (0.72 g, 1.0 mmol) in anhydrous dichloromethane (200 mL) was added BBr<sub>3</sub> (473 μL, 5 mmol) at 0 °C. The mixture was warmed slowly to room temperature and stirred for 12 h. Then the reaction was quenched by the addition of water (100 mL), and extracted with dichloromethane (3×200 mL). The combined organic layer was dried with anhydrous MgSO<sub>4</sub>, then concentrated under a reduced pressure to give a crude solid. The crude solid was purified by silica gel column chromatography (eluent: dichloromethane/methanol=10/1, v/v), to obtain compound **3**. Yield: 86% (0.55 g), white solid, M.p.: >280 °C. <sup>1</sup>H NMR (400 MHz, CDCl<sub>3</sub>, 298 K): δ 8.84 (s, 6 H), 7.88 (s, 6 H), 7.31 (s, 6 H), 3.79 (s, 6 H). <sup>13</sup>C NMR (100 MHz, CDCl<sub>3</sub>, 298 K): δ 155.9, 153.2, 123.9, 120.6, 117.3, 98.2. HRMS (APCI): *m/z* calcd for [M+H]<sup>+</sup>: C<sub>39</sub>H<sub>25</sub>O<sub>9</sub><sup>+</sup>: 637.1499, found 637.1496.

### 2.4 Synthesis of dimethoxydibenzofuran[3]arene triflate (4)

To a solution of **3** (0.55 g, 0.86 mmol) and pyridine (2 mL) in anhydrous CH<sub>2</sub>Cl<sub>2</sub> (200 mL) was added trifluoromethanesulfonic anhydride (1.1 ml, 3 mmol) at 0 °C for 6 hours. After the reaction was completed, the mixture was quenched by the addition of water (150 mL), and extracted with dichloromethane (3×200 mL). The organic phase was combined and the solvent was removed by rotary evaporation. The residue was purified by silica gel column chromatography (eluent: dichloromethane/petroleum ether=1/3, v/v) to obtain compound **4**. Yield: 61% (0.74 g), white solid, M.p.: 232-234 °C. <sup>1</sup>H NMR (400 MHz, CDCl<sub>3</sub>): δ 7.37 (s, 6 H), 7.05 (s, 6 H), 4.06 (s, 6 H). <sup>13</sup>C NMR (100 MHz, CDCl<sub>3</sub>, 298 K): δ 155.9, 146.8, 127.6, 123.1, 122.8, 118.6 (q, *J*<sub>(C,F)</sub>=320 Hz), 106.6, 28.7. HRMS (APCI): *m/z* calcd for [M]<sup>-</sup>: C<sub>45</sub>H<sub>18</sub>F<sub>18</sub>O<sub>21</sub>S<sub>6</sub><sup>-</sup>: 1427.8377, found 1427.8364.

### 2.5 Synthesis of O-doped aromatic belt 1

In the glovebox, to a dry Schlenk tube was added Ni(cod)<sub>2</sub> (444 mg, 1.62 mmol), and then added a fresh solution of 2,2'-bipyridyl (bpy, 252.9 mg, 1.62 mmol) in *N*-methyl-2-pyrrolidone (NMP) (18.0 mL). The mixture was stirred for 40 minutes at

room temperature and a dark purple solution was obtained. Then the mixture was heated to 80 °C in an oil bath for 5 minutes, and the solution of **4** (385.2 mg, 0.27 mmol) in anhydrous NMP (27.0 mL) was added and kept stirring at 95 °C for 6 h. The mixture was cooled down to room temperature, and then poured into a mixture of CH<sub>2</sub>Cl<sub>2</sub> (50 mL) and NH<sub>4</sub>Cl (saturated solution, 50 mL), and vigorously stirred for 10 minutes. The red organic layer was separated and washed with water (3×20 mL), and then concentrated to a minimum by a rotary evaporator. The concentrated dark red mixture was washed twice with water (50 mL), dichloromethane (5 mL) and toluene (20 mL) to completely remove NMP. Finally, the red product **1** were obtained by rapid separation using silica gel plate (eluent: dichloromethane/*n*-hexane/carbon disulfide=25/50/2, v/v/v). Yield: 10% (8 mg), red solid, M.p.: 150-152 °C. <sup>1</sup>H NMR (400 MHz, CDCl<sub>3</sub>, 298 K): δ 8.08 (s, 6H), 7.92 (s, 6H), 4.39 (d, *J*=16.0, 3H), 3.94 (d, *J*=16.0, 3H). <sup>13</sup>C NMR (126 MHz, CDCl<sub>3</sub>, 298 K): δ 163.1, 145.1, 140.6, 121.3, 120.9, 111.8, 41.0. HRMS (APCI): *m/z* calcd for [M+H]<sup>+</sup>: C<sub>39</sub>H<sub>19</sub>O<sub>3</sub><sup>+</sup>: 535.1334, found 535.1332.

**Table S1.** Optimization of the reaction conditions for **2**

| Entry | Catalyst                             | Solvent          | T     | Time | Yield          |
|-------|--------------------------------------|------------------|-------|------|----------------|
| 1     | AlCl <sub>3</sub>                    | DCM <sup>a</sup> | 0 °C  | 2 h  | - <sup>c</sup> |
| 2     | AlCl <sub>3</sub>                    | DCM              | 25 °C | 2 h  | -              |
| 3     | FeCl <sub>3</sub> ·6H <sub>2</sub> O | DCM              | 0 °C  | 2 h  | 33%            |
| 4     | FeCl <sub>3</sub> ·6H <sub>2</sub> O | DCM              | 25 °C | 4 h  | 11%            |
| 5     | BF <sub>3</sub> ·Et <sub>2</sub> O   | DCM              | 0 °C  | 2 h  | 29%            |
| 6     | BF <sub>3</sub> ·Et <sub>2</sub> O   | DCE <sup>b</sup> | 0 °C  | 2 h  | 13%            |
| 7     | BF <sub>3</sub> ·Et <sub>2</sub> O   | DCM              | 25 °C | 1 h  | 27%            |
| 8     | CF <sub>3</sub> CO <sub>2</sub> H    | DCM              | 0 °C  | 1 h  | -              |

<sup>a</sup>DCM=dichloromethane; <sup>b</sup>DCE=1,2-dichloroethane; <sup>c</sup>-=No product.

**Table S2.** Optimization of the reaction conditions for **1**

| Entry | Catalyst                                | Solvent          | T      | Time | Yield          |
|-------|-----------------------------------------|------------------|--------|------|----------------|
| 1     | Ni(cod) <sub>2</sub> , bpy <sup>a</sup> | NMP <sup>b</sup> | 80 °C  | 2 h  | 1%             |
| 2     | Ni(cod) <sub>2</sub> , bpy              | NMP              | 85 °C  | 2 h  | 1%             |
| 3     | Ni(cod) <sub>2</sub> , bpy              | NMP              | 90 °C  | 2 h  | 3%             |
| 4     | Ni(cod) <sub>2</sub> , bpy              | NMP              | 95 °C  | 4 h  | 4%             |
| 5     | Ni(cod) <sub>2</sub> , bpy              | NMP              | 95 °C  | 6 h  | 10%            |
| 6     | Ni(cod) <sub>2</sub> , bpy              | NMP              | 95 °C  | 8 h  | 8%             |
| 7     | Ni(cod) <sub>2</sub> , bpy              | NMP              | 100 °C | 2 h  | - <sup>c</sup> |

<sup>a</sup>bpy=2,2'-bipyridyl; <sup>b</sup>NMP= *N*-methyl-2-pyrrolidone; <sup>c</sup>-=No product.

### 3. $^1\text{H}$ , $^{13}\text{C}$ NMR and HRMS spectra for new compounds

ysl-1 #13 RT: 0.16 AV: 1 NL: 8.13E5  
T: FTMS (1,1) + p APCI corona Full ms [100.00-1000.00]

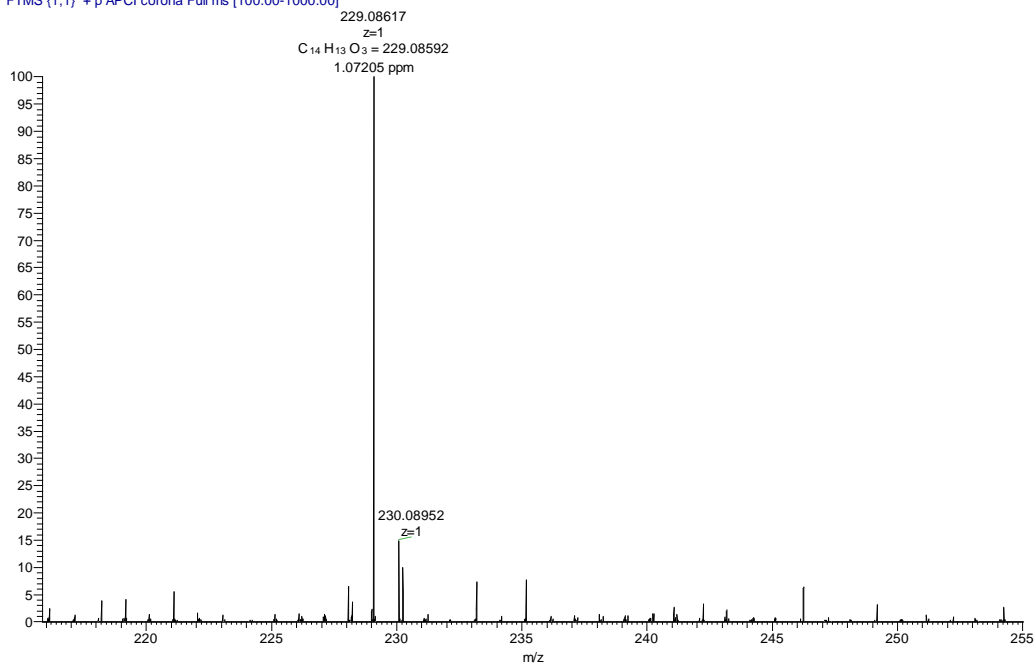

**Fig. S1.** HRMS (APCI, positive ion mode) spectrum of 3,7-dimethoxydibenzofuran.

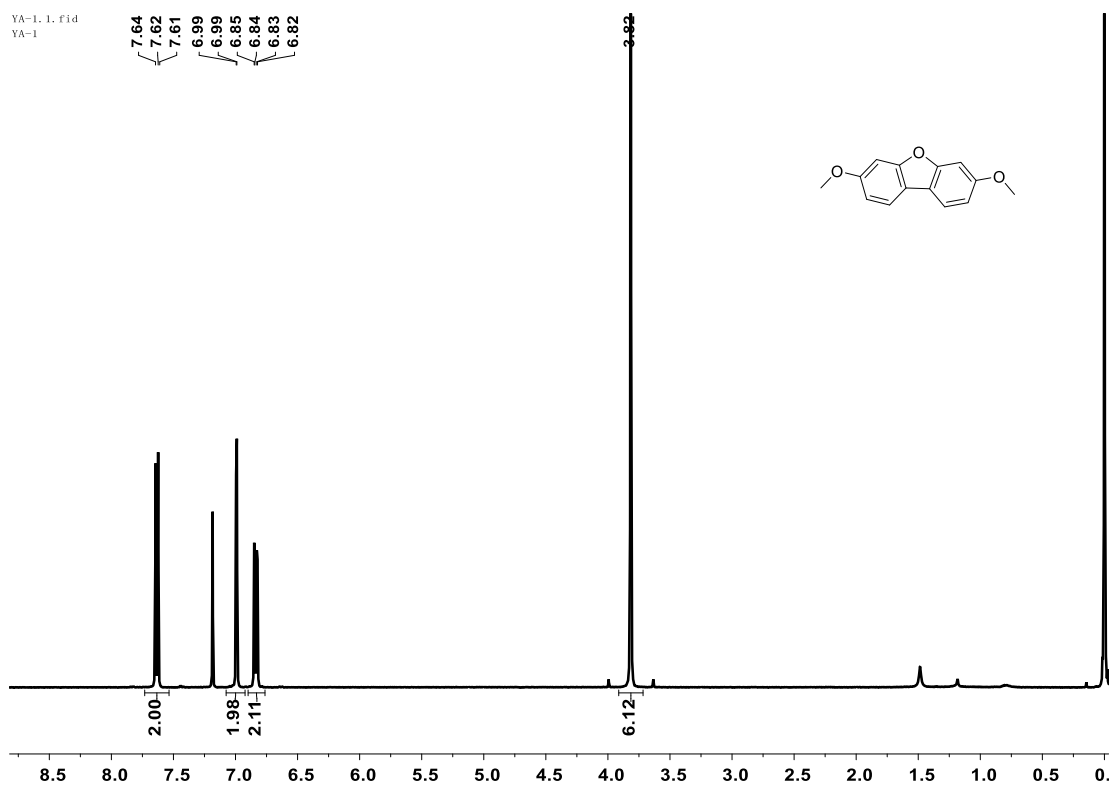

**Fig. S2.**  $^1\text{H}$  NMR spectrum (400 MHz,  $\text{CDCl}_3$ , 298K) of 3,7-dimethoxydibenzofuran.

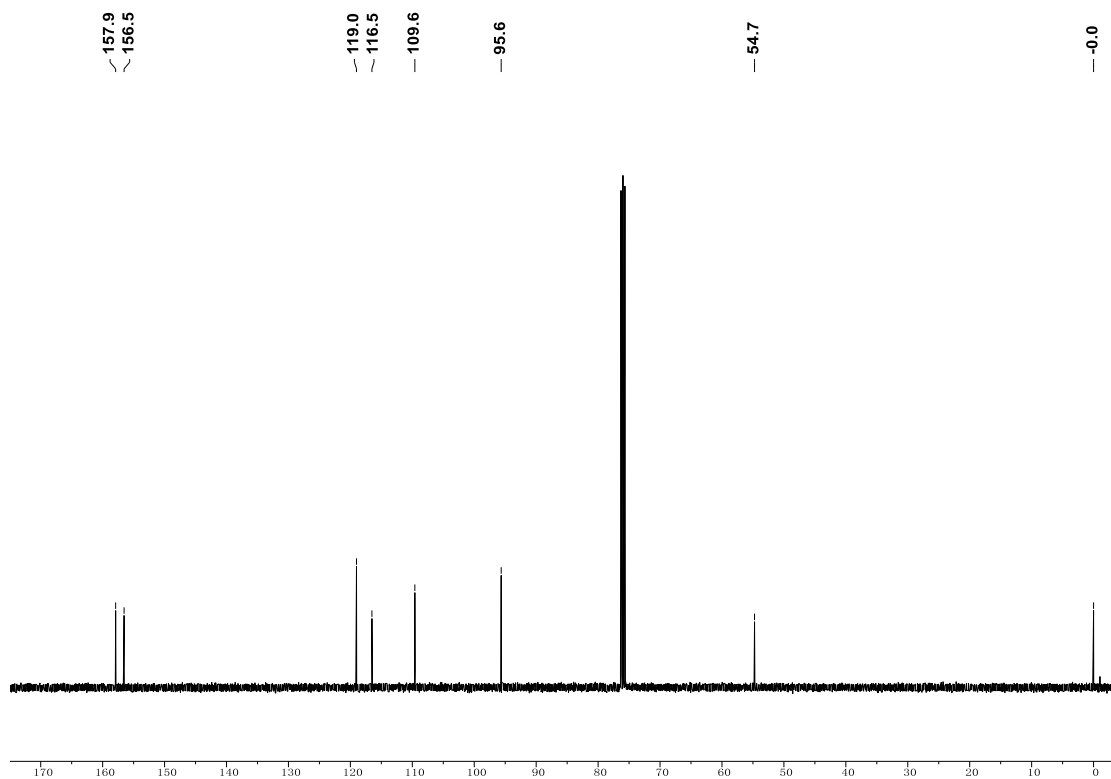

**Fig. S3.**  $^{13}\text{C}$  NMR spectrum (100 MHz,  $\text{CDCl}_3$ , 298K) of 3,7-dimethoxydibenzofuran.

ysl-2 #13 RT: 0.16 AV: 1 NL: 3.94E5  
T: FTMS (1,1) + p APCI corona Full ms [100.00-1000.00]

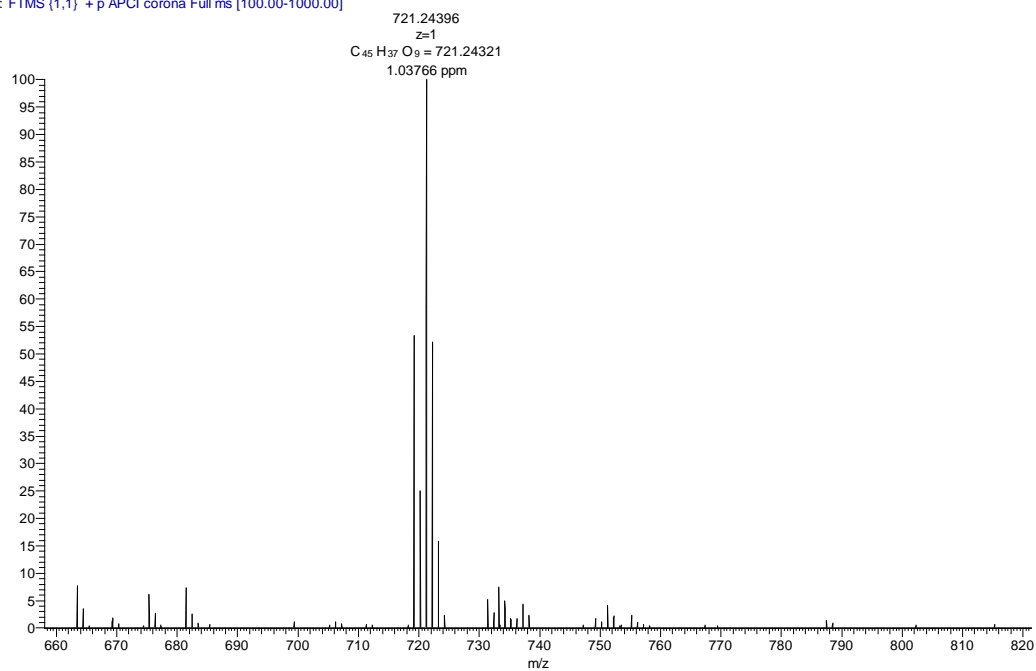

**Fig. S4.** HRMS (APCI, positive ion mode) spectrum of **2**.



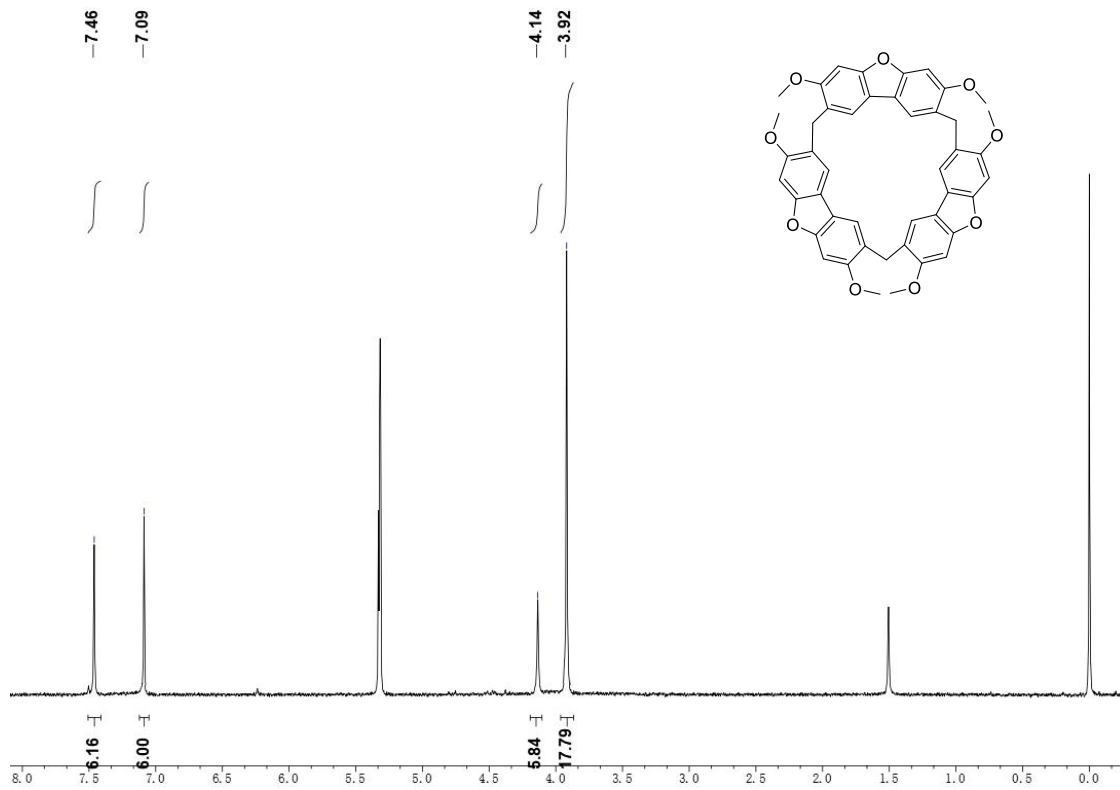

Fig. S5.  $^1\text{H}$  NMR spectrum (400 MHz,  $\text{CD}_2\text{Cl}_2$ , 298 K) of **2**.

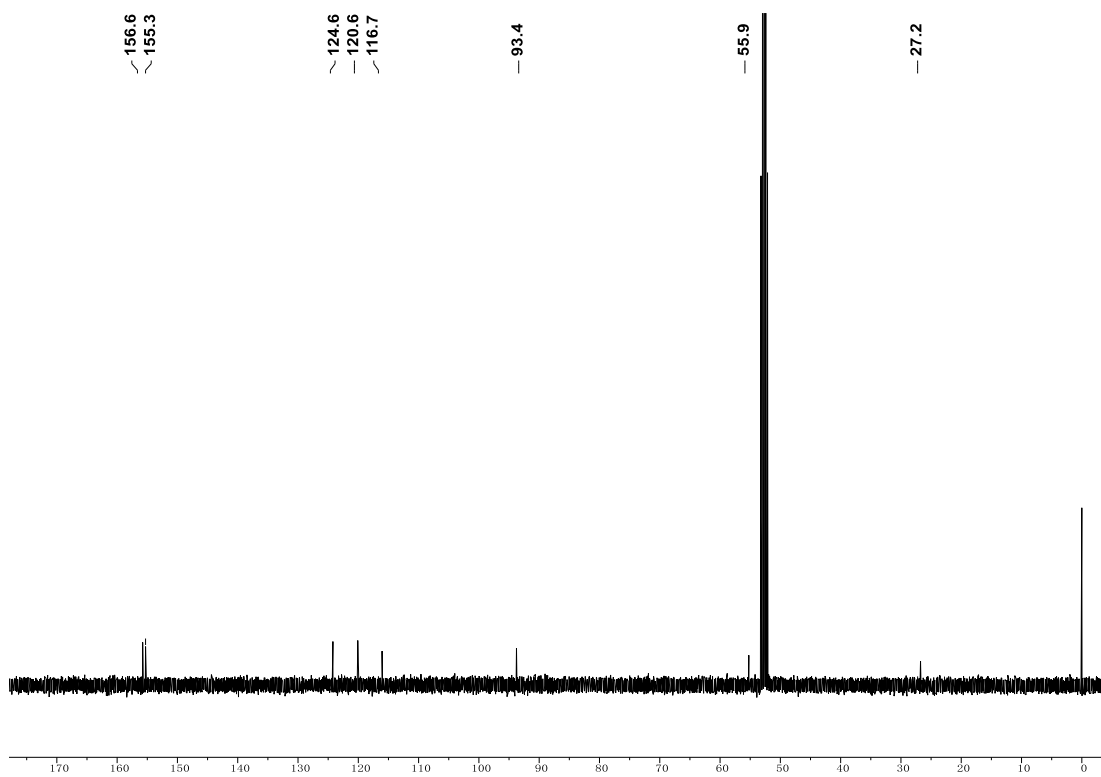

Fig. S6.  $^{13}\text{C}$  NMR (100 MHz,  $\text{CD}_2\text{Cl}_2$ , 298 K) spectrum of **2**.

ysl-3 #11 RT: 0.14 AV: 1 NL: 4.60E6  
T: FTMS (1,1) + p APCI corona Full ms [100.00-1000.00]

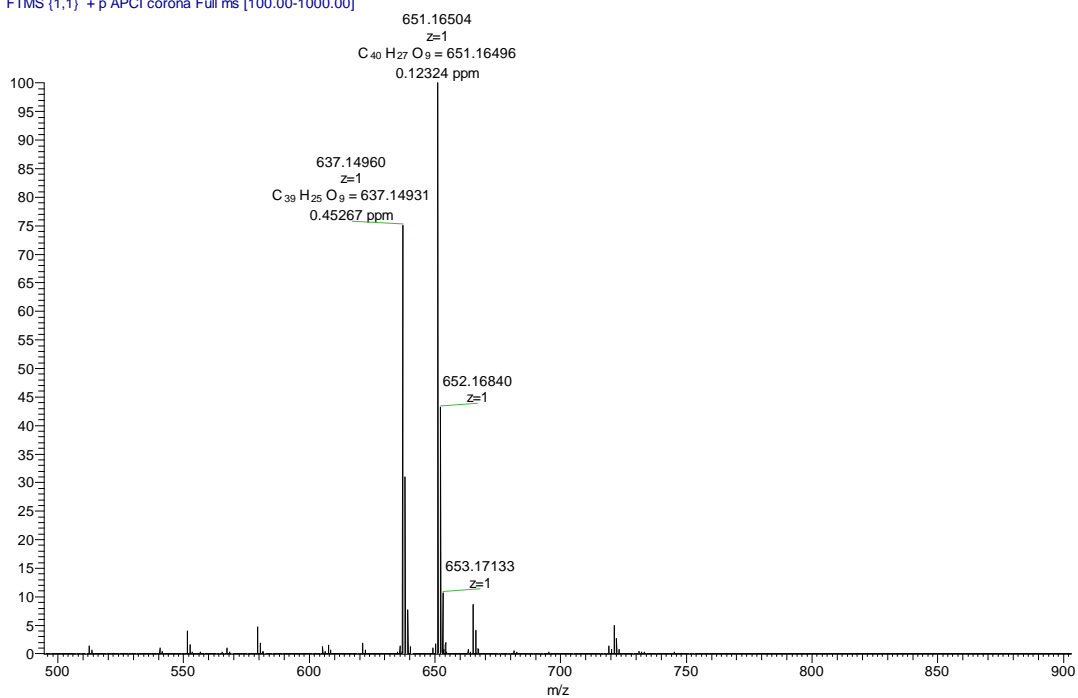

**Fig. S7.** HRMS (APCI, positive ion mode) spectrum of **3**.

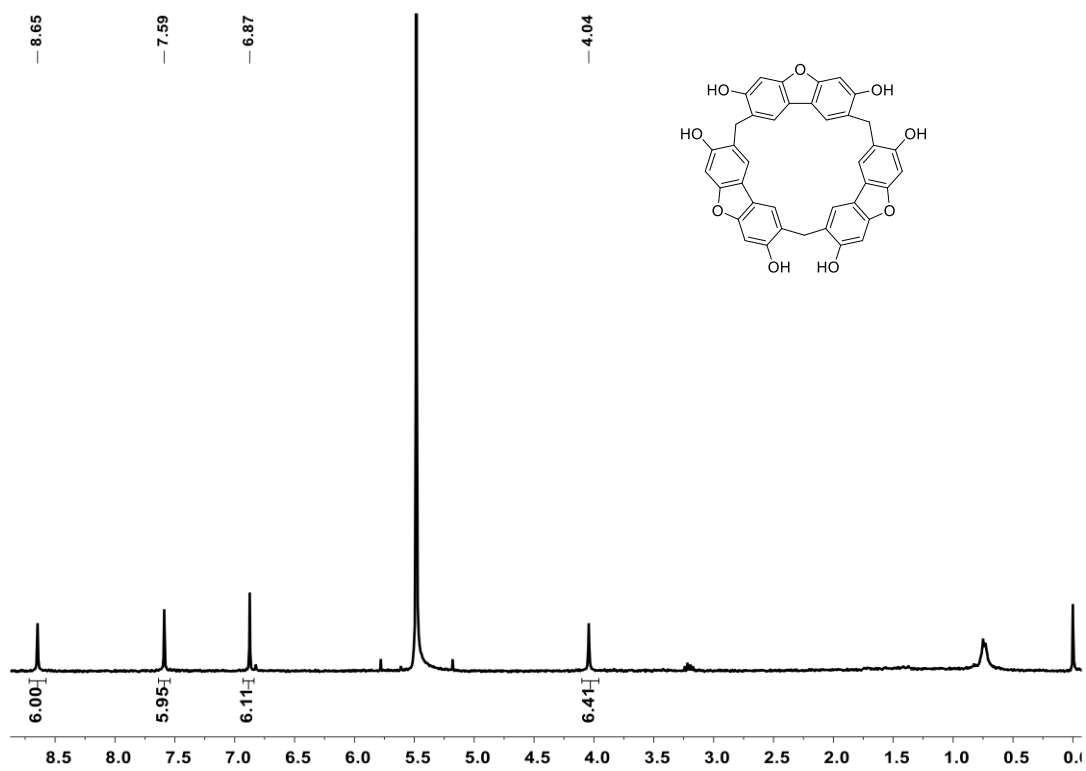

**Fig. S8.** <sup>1</sup>H NMR spectrum (400 MHz, acetone-*d*<sub>6</sub>, 298K) of **3**.

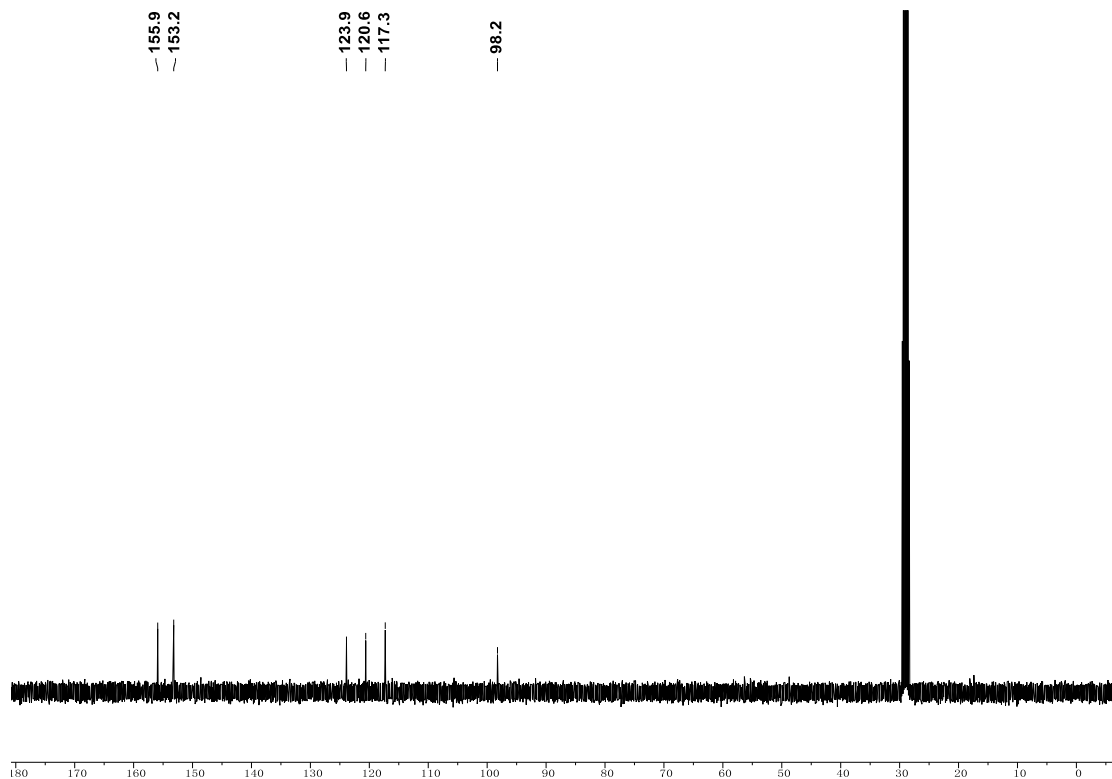

**Fig. S9.**  $^{13}\text{C}$  NMR (100 MHz, acetone- $d_6$ , 298 K) spectrum of **3**.

ysl-4 #10 RT: 0.12 AV: 1 NL: 1.59E7  
 T: FTMS (1,2) - p APCI corona Full ms [200.00-2000.00]

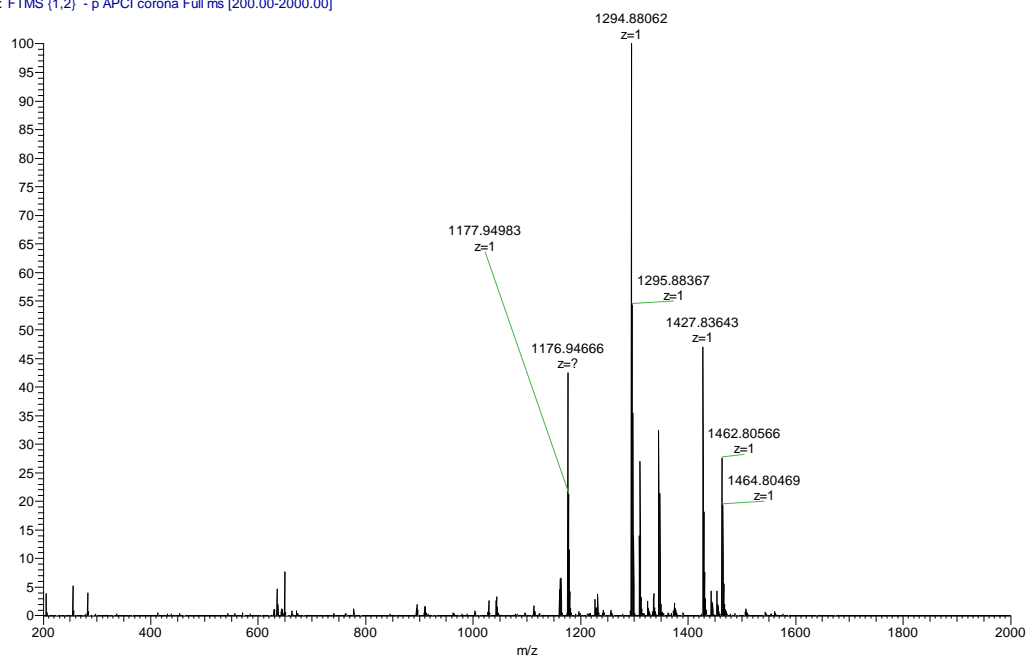

**Fig. S10.** HRMS (APCI, negative ion mode) spectrum of **4**.

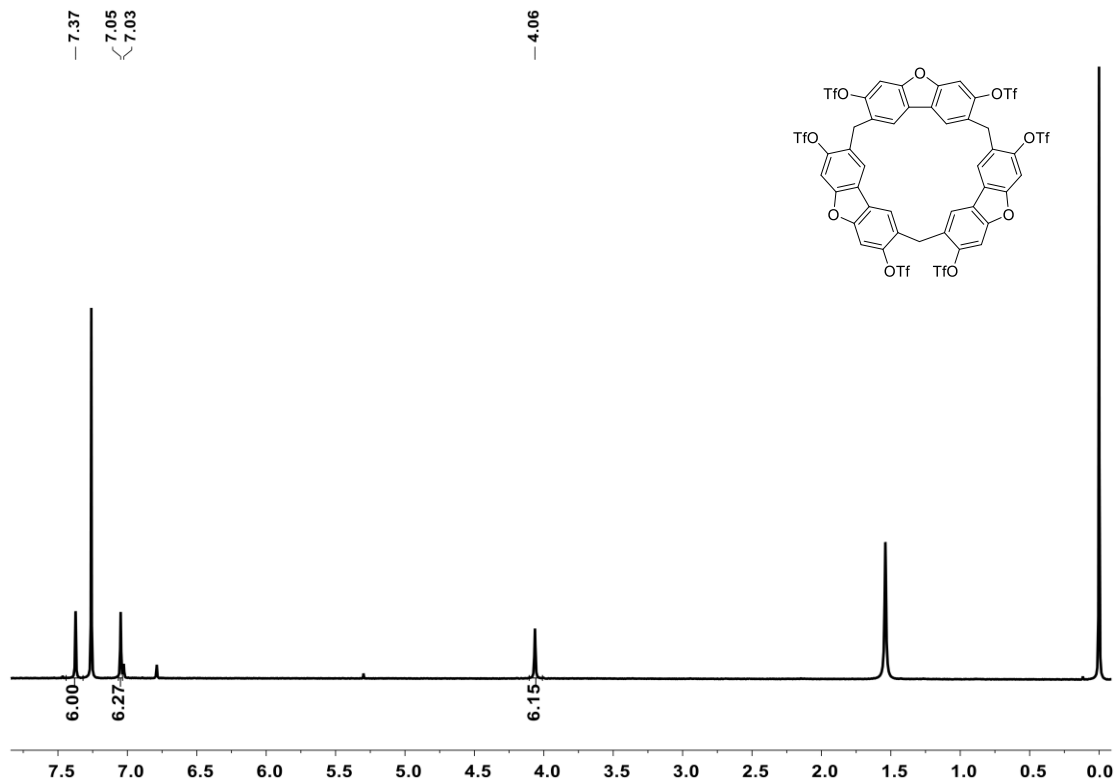

Fig. S11. <sup>1</sup>H NMR spectrum (400 MHz, CDCl<sub>3</sub>, 298K) of 4.

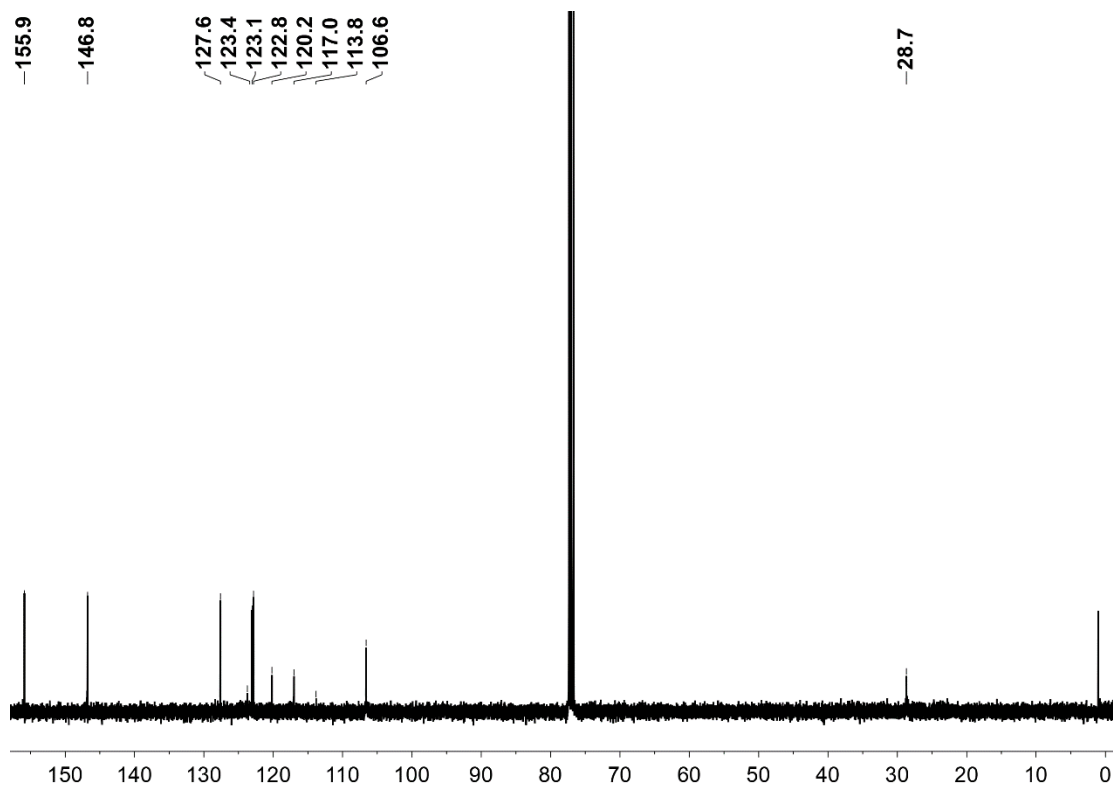

Fig. S12. <sup>13</sup>C NMR (100 MHz, CDCl<sub>3</sub>, 298 K) spectrum of 4.

ysl-5 #23 RT: 0.28 AV: 1 NL: 1.68E6  
T: FTMS (1,1) + p APCI corona Full ms [100.00-1000.00]

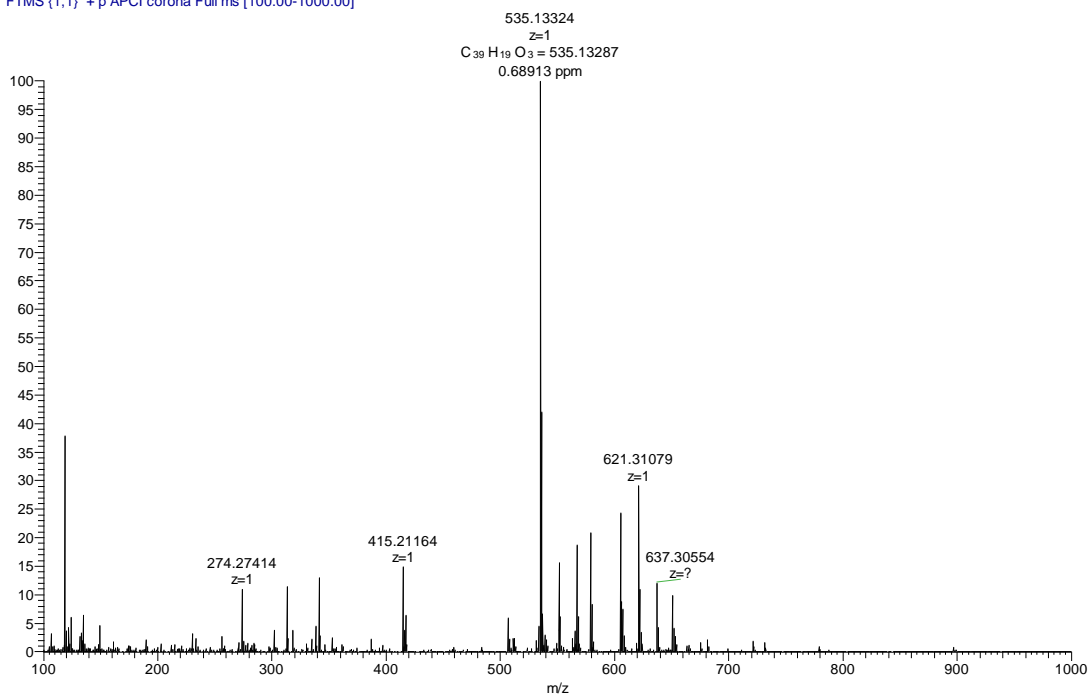

Fig. S13. HRMS (APCI, positive ion mode) spectrum of **1**.

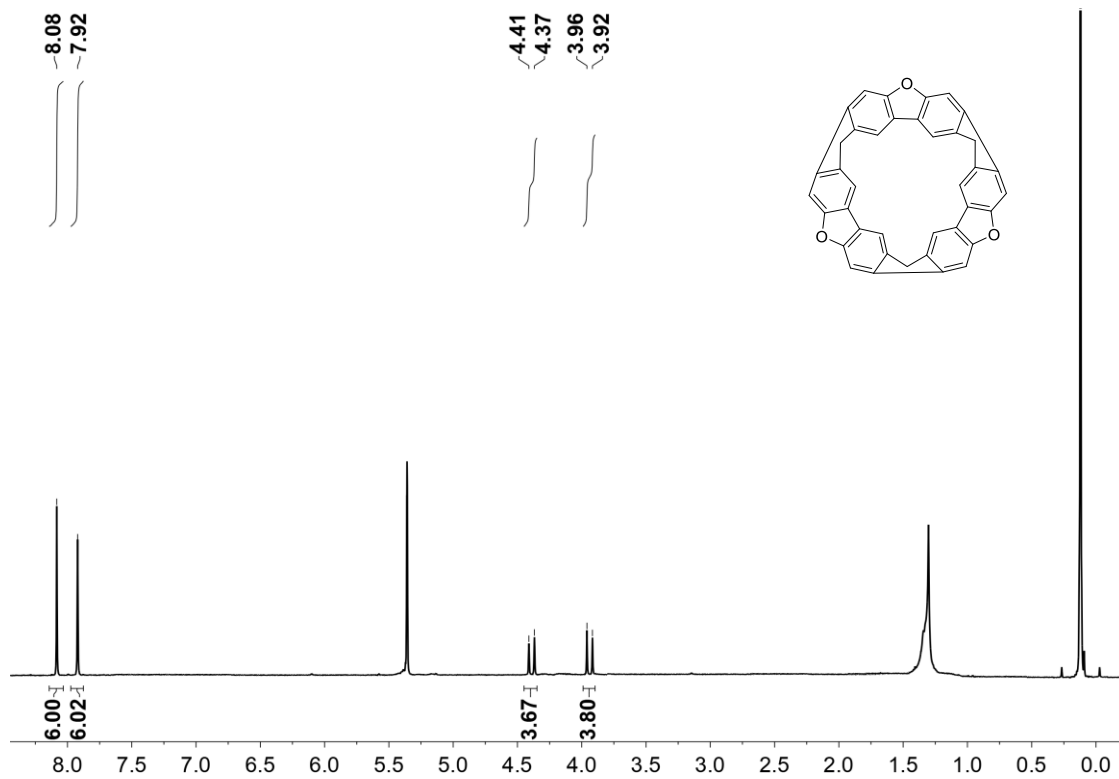

Fig. S14. <sup>1</sup>H NMR spectrum (400 MHz, CD<sub>2</sub>Cl<sub>2</sub>, 298K) of **1**.

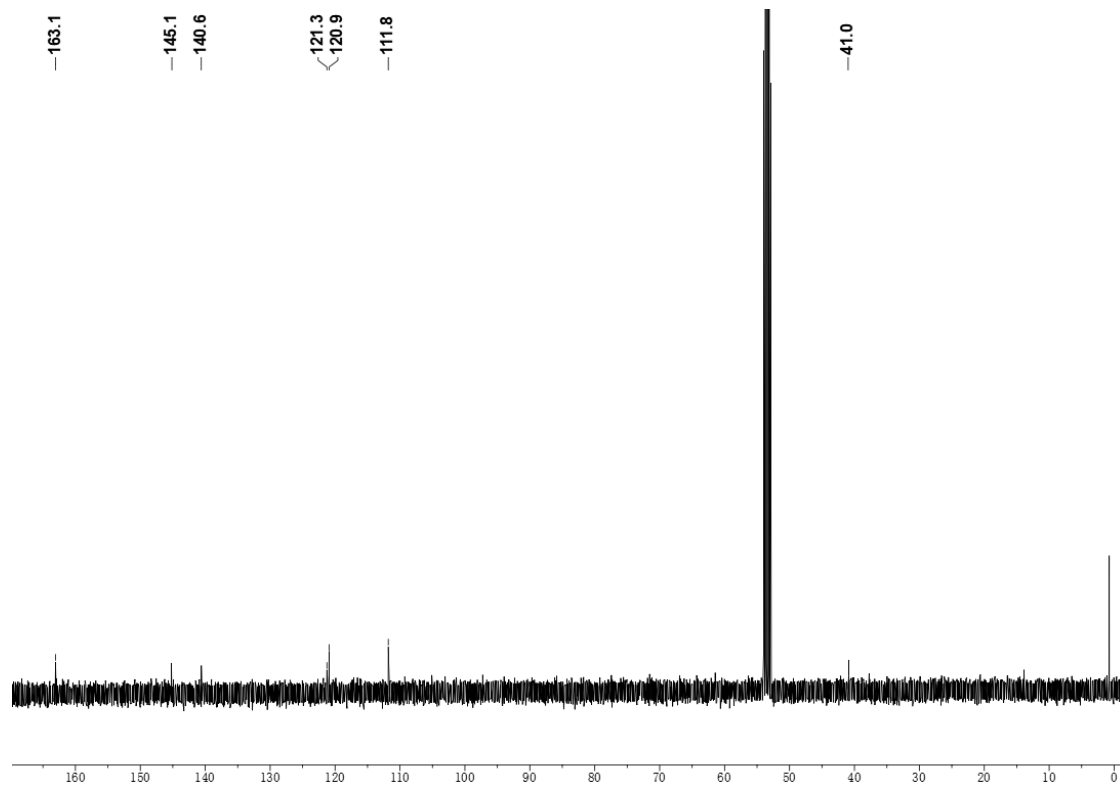

**Fig. S15.**  $^{13}\text{C}$  NMR (126 MHz,  $\text{CD}_2\text{Cl}_2$ , 298 K) spectrum of **1**.

#### 4. X-Ray crystallographic analysis

Crystallographic data are summarized in Table S3-S4. A single crystal of belt **1** was obtained by vapor diffusion of CH<sub>3</sub>CN into a solution of **1** in CH<sub>2</sub>Cl<sub>2</sub>. The crystal of **2** were cultivated by vapor diffusion of CH<sub>3</sub>CN into a solution of **2** in CH<sub>2</sub>Cl<sub>2</sub>. The data of **1** and **2** were collected at 170 K on a Rigaku Synergy-R diffractometers with MoK $\alpha$  radiation ( $\lambda = 1.54184 \text{ \AA}$ ) focused by multilayer confocal mirror.

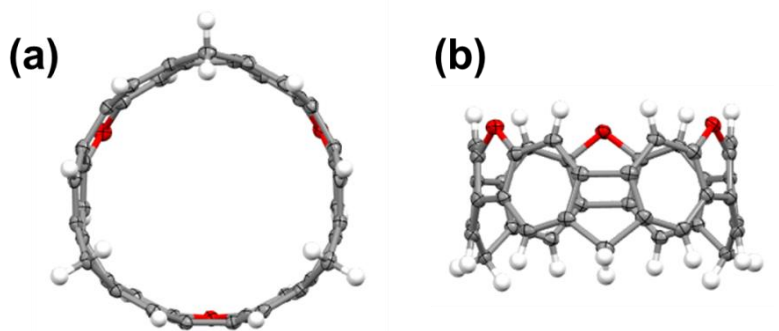

**Fig. S16.** ORTEP drawing of belt **1** from (a) top view and (b) side view (the thermal ellipsoids are displayed at a 30 % probability).

**Table S3.** X-ray crystallographic and the refinement data of **1**  
(CCDC 2279354)

|                   |                                                |
|-------------------|------------------------------------------------|
| Empirical formula | C <sub>39</sub> H <sub>18</sub> O <sub>3</sub> |
| Formula weight    | 534.53                                         |
| Temperature/K     | 169.99(10)                                     |
| Crystal system    | monoclinic                                     |
| Space group       | P2 <sub>1</sub> /n                             |
| a/Å               | 11.4275(4)                                     |
| b/Å               | 15.9886(6)                                     |
| c/Å               | 16.0325(4)                                     |
| $\alpha$ /°       | 90                                             |
| $\beta$ /°        | 97.391(3)                                      |

|                                                  |                                                               |
|--------------------------------------------------|---------------------------------------------------------------|
| $\gamma/^\circ$                                  | 90                                                            |
| Volume/ $\text{\AA}^3$                           | 2904.96(17)                                                   |
| Z                                                | 4                                                             |
| $\rho_{\text{calc}}/\text{cm}^3$                 | 1.222                                                         |
| $\mu/\text{mm}^{-1}$                             | 0.610                                                         |
| F(000)                                           | 1104.0                                                        |
| Crystal size/ $\text{mm}^3$                      | $0.18 \times 0.02 \times 0.02$                                |
| Radiation                                        | CuK $\alpha$ ( $\lambda = 1.54184$ )                          |
| 2 $\Theta$ range for data<br>collection/         | 7.842 to 152.678                                              |
| Index ranges                                     | $-14 \leq h \leq 14, -20 \leq k \leq 19, -15 \leq l \leq 20$  |
| Reflections collected                            | 40878                                                         |
| Independent reflections                          | 5953 [ $R_{\text{int}} = 0.0715, R_{\text{sigma}} = 0.0430$ ] |
| Data/restraints/parameter<br>s                   | 5953/0/379                                                    |
| Goodness-of-fit on $F^2$                         | 1.056                                                         |
| Final R indexes [ $I \geq 2\sigma$<br>(I)]       | $R_1 = 0.0634, wR_2 = 0.1471$                                 |
| Final R indexes [all data]                       | $R_1 = 0.0845, wR_2 = 0.1585$                                 |
| Largest diff. peak/hole / e<br>$\text{\AA}^{-3}$ | 0.25/-0.22                                                    |

---



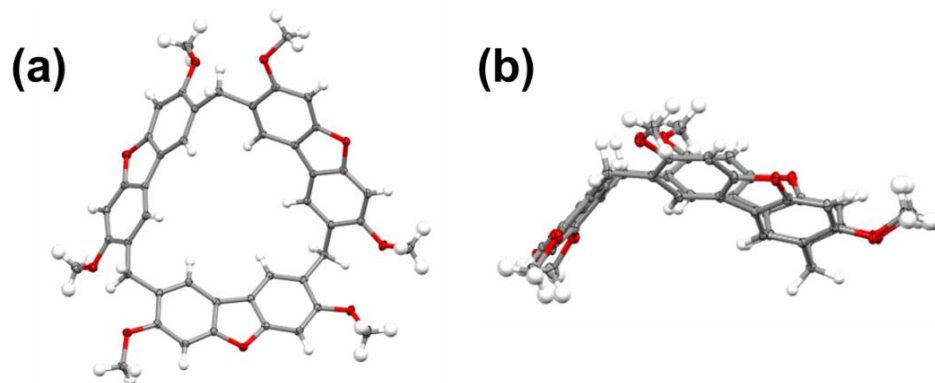

**Fig. S17.** ORTEP drawing of **2** from (a) top view and (b) side view (the thermal ellipsoids are displayed at a 30 % probability).

**Table S4.** X-ray crystallographic and the refinement data of **2**  
(CCDC 2279353)

|                                       |                                                |
|---------------------------------------|------------------------------------------------|
| Empirical formula                     | C <sub>45</sub> H <sub>36</sub> O <sub>9</sub> |
| Formula weight                        | 720.74                                         |
| Temperature/K                         | 169.99(10)                                     |
| Crystal system                        | orthorhombic                                   |
| Space group                           | Pbcm                                           |
| a/Å                                   | 16.1779(3)                                     |
| b/Å                                   | 7.77835(17)                                    |
| c/Å                                   | 27.1947(7)                                     |
| $\alpha$ /°                           | 90                                             |
| $\beta$ /°                            | 90                                             |
| $\gamma$ /°                           | 90                                             |
| Volume/Å <sup>3</sup>                 | 3422.12(13)                                    |
| Z                                     | 4                                              |
| $\rho_{\text{calc}}$ /cm <sup>3</sup> | 1.399                                          |
| $\mu$ /mm <sup>-1</sup>               | 0.795                                          |

|                                             |                                                               |
|---------------------------------------------|---------------------------------------------------------------|
| F(000)                                      | 1512.0                                                        |
| Crystal size/mm <sup>3</sup>                | 0.5 × 0.5 × 0.05                                              |
| Radiation                                   | CuKα (λ = 1.54184)                                            |
| 2θ range for data collection/               | 5.462 to 150.634                                              |
| Index ranges                                | -20 ≤ h ≤ 12, -7 ≤ k ≤ 9, -33 ≤ l ≤ 33                        |
| Reflections collected                       | 13451                                                         |
| Independent reflections                     | 3546 [R <sub>int</sub> = 0.0636, R <sub>sigma</sub> = 0.0584] |
| Data/restraints/parameters                  | 3546/0/251                                                    |
| Goodness-of-fit on F <sup>2</sup>           | 1.072                                                         |
| Final R indexes [I ≥ 2σ (I)]                | R <sub>1</sub> = 0.0471, wR <sub>2</sub> = 0.1158             |
| Final R indexes [all data]                  | R <sub>1</sub> = 0.0526, wR <sub>2</sub> = 0.1194             |
| Largest diff. peak/hole / e Å <sup>-3</sup> | 0.29/-0.22                                                    |

---

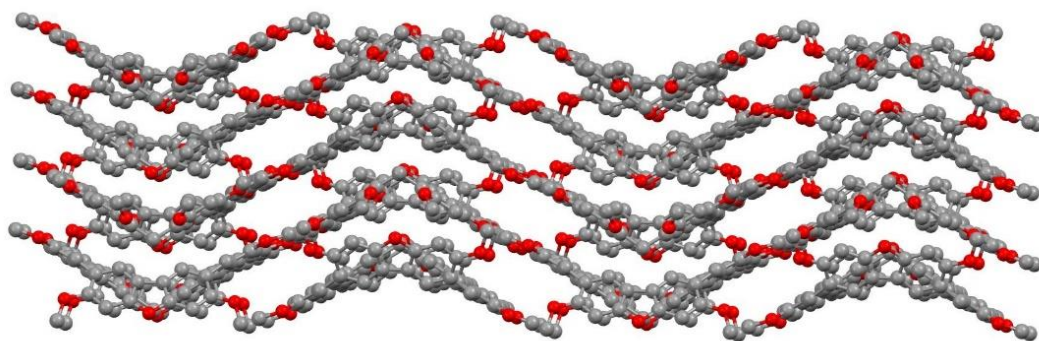

**Fig. S18.** Packing of the crystal structure of **2** viewed along the *a*-axis.

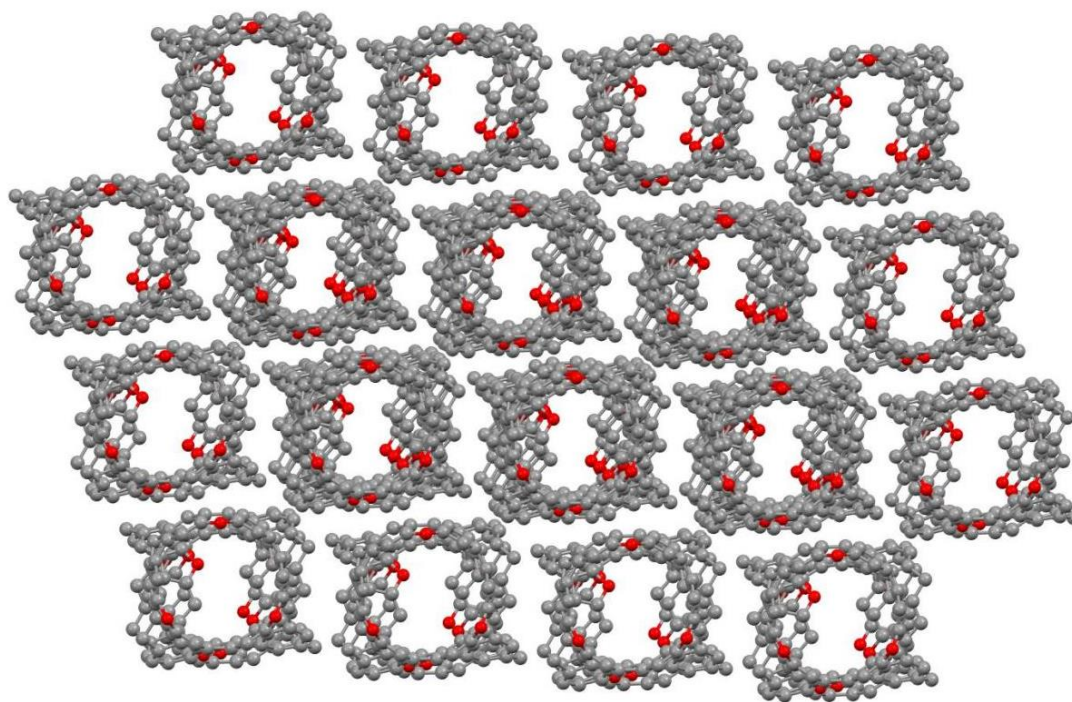

**Fig. S19.** Packing of the crystal structure of belt **1** viewed along the *a*-axis.

## 5. Theoretical calculations

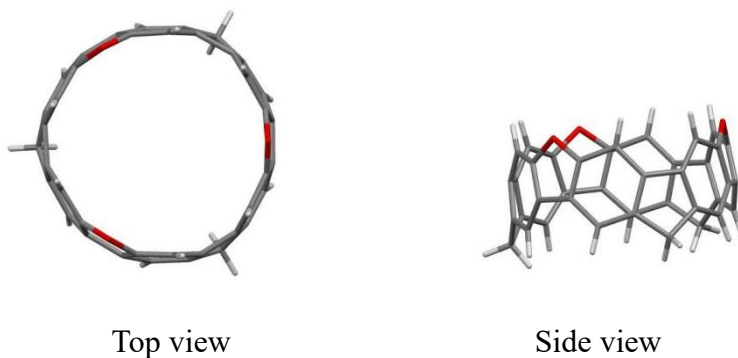

**Fig. S20.** Energy minimized structures of **1** depicting (a) top and (b) side views.

Excitation energies and oscillator strengths:

|                  |           |           |           |          |                                  |
|------------------|-----------|-----------|-----------|----------|----------------------------------|
| Excited State 1: | Singlet-A | 2.6358 eV | 470.38 nm | f=0.0009 | $\langle S^{*2} \rangle = 0.000$ |
|                  | 136 ->141 | -0.11387  |           |          |                                  |
|                  | 137 ->140 | -0.13460  |           |          |                                  |
|                  | 138 ->139 | 0.68004   |           |          |                                  |

This state for optimization and/or second-order correction.

Total Energy, E(TD-HF/TD-DFT) = -1721.59825989

Copying the excited state density for this state as the 1-particle RhoCI density.

|                  |           |           |           |          |                                  |
|------------------|-----------|-----------|-----------|----------|----------------------------------|
| Excited State 2: | Singlet-A | 3.8351 eV | 323.29 nm | f=0.9671 | $\langle S^{*2} \rangle = 0.000$ |
|                  | 137 ->139 | -0.46368  |           |          |                                  |
|                  | 138 ->140 | 0.48898   |           |          |                                  |

|                  |           |           |           |          |                                  |
|------------------|-----------|-----------|-----------|----------|----------------------------------|
| Excited State 3: | Singlet-A | 3.9432 eV | 314.42 nm | f=0.7726 | $\langle S^{*2} \rangle = 0.000$ |
|                  | 136 ->139 | -0.43042  |           |          |                                  |
|                  | 138 ->141 | 0.48774   |           |          |                                  |
|                  | 138 ->143 | -0.10835  |           |          |                                  |

|                  |           |           |           |          |              |
|------------------|-----------|-----------|-----------|----------|--------------|
| Excited State 4: | Singlet-A | 4.1685 eV | 297.43 nm | f=0.1152 | <S**2>=0.000 |
| 133 ->139        | 0.11739   |           |           |          |              |
| 134 ->139        | 0.33092   |           |           |          |              |
| 135 ->139        | 0.28906   |           |           |          |              |
| 135 ->141        | 0.13663   |           |           |          |              |
| 137 ->144        | 0.10066   |           |           |          |              |
| 138 ->140        | -0.12885  |           |           |          |              |
| 138 ->141        | 0.12727   |           |           |          |              |
| 138 ->142        | 0.28623   |           |           |          |              |
| 138 ->143        | 0.10984   |           |           |          |              |
| 138 ->144        | -0.21467  |           |           |          |              |

|                  |           |           |           |          |              |
|------------------|-----------|-----------|-----------|----------|--------------|
| Excited State 5: | Singlet-A | 4.2001 eV | 295.20 nm | f=0.1769 | <S**2>=0.000 |
| 133 ->139        | 0.43903   |           |           |          |              |
| 134 ->139        | -0.12826  |           |           |          |              |
| 134 ->140        | 0.11636   |           |           |          |              |
| 138 ->140        | -0.10981  |           |           |          |              |
| 138 ->141        | -0.15315  |           |           |          |              |
| 138 ->143        | -0.33610  |           |           |          |              |
| 138 ->144        | -0.14230  |           |           |          |              |

### Cartesian coordinates of the optimized structures

All compounds mentioned in this article were optimized to the minimum with no imaginary frequency.

| Atom | X           | Y           | Z           |
|------|-------------|-------------|-------------|
| C    | -0.02292600 | -3.84985300 | -1.02188500 |
| C    | -1.31947600 | -3.57025500 | -1.40612000 |
| C    | 0.39386400  | -3.97164700 | 0.31978300  |

|   |             |             |             |
|---|-------------|-------------|-------------|
| C | -2.21147700 | -3.36143200 | -0.35259300 |
| H | -1.54329800 | -3.29218700 | -2.42890800 |
| O | 1.07009500  | -3.60229000 | -1.86549900 |
| C | -0.57085800 | -3.94965200 | 1.33370100  |
| C | 1.79448300  | -3.54685700 | 0.32153300  |
| C | -1.87404600 | -3.60329100 | 0.97839500  |
| C | -3.27226200 | -2.33592400 | -0.37327400 |
| C | 2.09705200  | -3.24064000 | -1.01456300 |
| H | -0.27744100 | -3.98381700 | 2.37884200  |
| C | 2.59122500  | -3.00454900 | 1.33438500  |
| C | -2.94907800 | -3.03298400 | 1.88686900  |
| C | -3.55568400 | -1.46626300 | -1.39439100 |
| C | -3.56395000 | -2.00741700 | 0.99944900  |
| C | 3.07162100  | -2.33420500 | -1.38302200 |
| C | 3.51331500  | -2.06115600 | 1.01492800  |
| H | 2.33649500  | -3.18681000 | 2.37581000  |
| H | -2.53546200 | -2.60784400 | 2.80598700  |
| H | -3.66805000 | -3.80705100 | 2.18860900  |
| C | -3.88515600 | -0.17097600 | -1.01834700 |
| H | -3.27562400 | -1.66487900 | -2.42339500 |
| C | -3.94950800 | -0.73096500 | 1.32370600  |
| C | 3.71280300  | -1.65202900 | -0.34580300 |
| H | 3.12572900  | -1.99809900 | -2.41281800 |
| C | 4.08147300  | -0.97243100 | 1.91188400  |
| C | -4.02160600 | 0.23664300  | 0.32028600  |
| O | -3.71193800 | 0.91457500  | -1.86594100 |
| H | -4.00851000 | -0.43206100 | 2.36769000  |

|   |             |             |             |
|---|-------------|-------------|-------------|
| C | 4.07830900  | -0.24769700 | -0.32952700 |
| C | 4.09336400  | 0.20992300  | 0.99545700  |
| H | 5.09041200  | -1.22827600 | 2.26455700  |
| H | 3.46856600  | -0.80961300 | 2.80331900  |
| C | -3.69601000 | 1.62909600  | 0.33932800  |
| C | -3.40110800 | 1.98288100  | -1.02118100 |
| C | 3.85108300  | 0.66208700  | -1.40421100 |
| C | 3.73606100  | 1.48888700  | 1.33535100  |
| C | -3.16435100 | 2.46566900  | 1.34767400  |
| C | -2.48867900 | 2.95697000  | -1.40210500 |
| C | 3.41261000  | 1.93065300  | -1.01665600 |
| H | 3.72959100  | 0.33379100  | -2.42927500 |
| C | 3.30648000  | 2.34895600  | 0.30103400  |
| H | 3.59176500  | 1.76376000  | 2.37591300  |
| C | -2.23700800 | 3.42123200  | 0.99805000  |
| H | -3.32049200 | 2.22117400  | 2.39523300  |
| C | -1.83902000 | 3.59799500  | -0.36129700 |
| H | -2.14123600 | 2.99862900  | -2.42792500 |
| O | 2.63973500  | 2.69847100  | -1.85465200 |
| C | 2.21685700  | 3.33332600  | 0.29856900  |
| C | -1.17899900 | 4.01932700  | 1.90860600  |
| C | -0.40124900 | 3.95301200  | -0.36184100 |
| C | 1.79459200  | 3.40540200  | -1.02533000 |
| C | 1.35471400  | 3.71566300  | 1.33364700  |
| C | 0.01967700  | 4.00933100  | 0.99373300  |
| H | -1.02449200 | 3.42691400  | 2.81455100  |
| H | -1.44002700 | 5.03750300  | 2.22665900  |

|   |            |            |             |
|---|------------|------------|-------------|
| C | 0.49707600 | 3.73388600 | -1.38840200 |
| H | 1.64685900 | 3.60822000 | 2.37370800  |
| H | 0.17681400 | 3.59029100 | -2.41472800 |

**Table S5.** Major electronic transitions of aromatic belt **1**

| Excited State                  | Energy (eV) | Excitation (nm) | Oscillator strength (f) | Transition type |              |  |
|--------------------------------|-------------|-----------------|-------------------------|-----------------|--------------|--|
| s <sub>0</sub> -s <sub>1</sub> | 2.6191      | 473.38          | 0.0005                  | H->L 92.6%      |              |  |
| s <sub>0</sub> -s <sub>2</sub> | 3.9259      | 315.81          | 0.63470                 | H->L+1 44.6%    | H-1->L 39.2% |  |
| s <sub>0</sub> -s <sub>3</sub> | 3.9994      | 310.01          | 0.41080                 | H->L+2 40.6%    | H-2->L 30.3% |  |

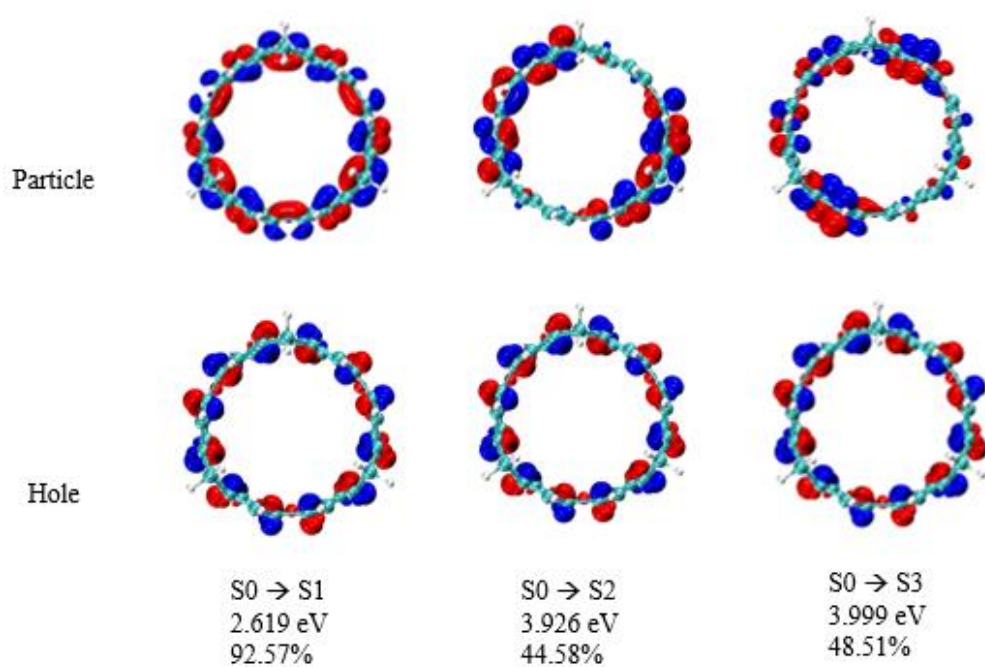

**Fig. S21.** Frontier molecular orbitals of **1** calculated at the B3LYP/6-31G(d) level of theory.



## 6. Reference:

- S1. Gaussian 09, Revision A.02, M. J. Frisch, G. W. Trucks, H. B. Schlegel, G. E. Scuseria, M. A. Robb, J. R. Cheeseman, G. Scalmani, V. Barone, B. Mennucci, G. A. Petersson, H. Nakatsuji, M. Caricato, X. Li, H. P. Hratchian, A. F. Izmaylov, J. Bloino, G. Zheng, J. L. Sonnenberg, M. Hada, M. Ehara, K. Toyota, R. Fukuda, J. Hasegawa, M. Ishida, T. Nakajima, Y. Honda, O. Kitao, H. Nakai, T. Vreven, J. A. Montgomery, Jr., J. E. Peralta, F. Ogliaro, M. Bearpark, J. J. Heyd, E. Brothers, K. N. Kudin, V. N. Staroverov, R. Kobayashi, J. Normand, K. Raghavachari, A. Rendell, J. C. Burant, S. S. Iyengar, J. Tomasi, M. Cossi, N. Rega, J. M. Millam, M. Klene, J. E. Knox, J. B. Cross, V. Bakken, C. Adamo, J. Jaramillo, R. Gomperts, R. E. Stratmann, O. Yazyev, A. J. Austin, R. Cammi, C. Pomelli, J. W. Ochterski, R. L. Martin, K. Morokuma, V. G. Zakrzewski, G. A. Voth, P. Salvador, J. J. Dannenberg, S. Dapprich, A. D. Daniels, O. Farkas, J. B. Foresman, J. V. Ortiz, J. Cioslowski, and D. J. Fox, Gaussian, Inc., Wallingford CT, 2009.
